# Supplementary material for: Ten Years of BrainAGE as a Neuroimaging Biomarker of Brain Aging: What Insights Have We Gained?
Source: PubMed Central journal article supplement (PMC6702897; doi:10.3389/fneur.2019.00789), 2019-08-14
Supplement: Image_1.pdf [file Image_1.pdf]

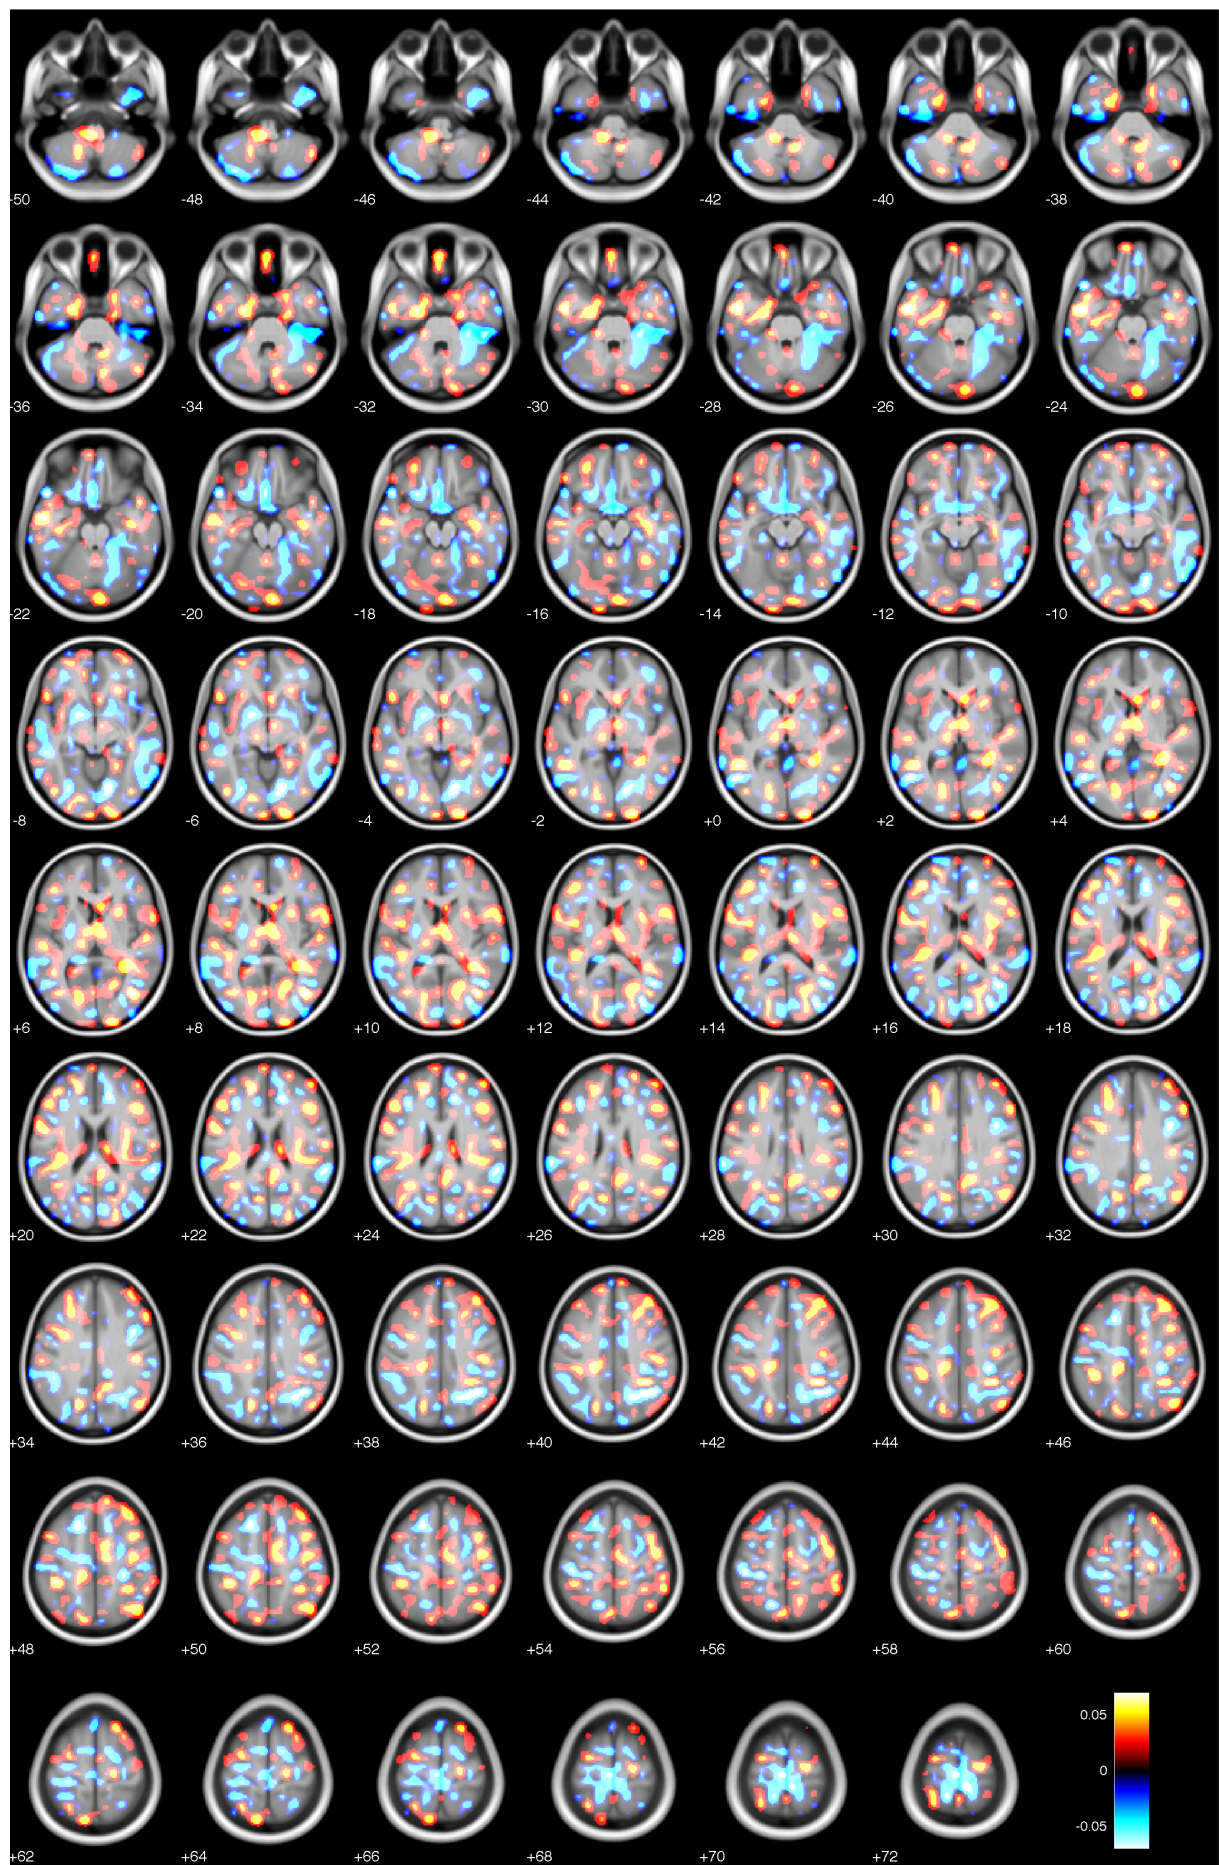

**Figure S1. Exemplary GM weight map for age regression during maturation in RVR.** To exemplarily illustrate the most important GM features that were used by the RVR for estimating the age in childhood and adolescence based on structural MRI data, weights below the 5<sup>th</sup> and above the 95<sup>th</sup> quartile are displayed, overlaid on the normalized mean image of the sample. Color scale indicates the weight. [Figure and legend reproduced from (Franke et al., 2012), with permission from Elsevier, Amsterdam.]
