# Supplementary material for: Ten Years of BrainAGE as a Neuroimaging Biomarker of Brain Aging: What Insights Have We Gained?
Source: PubMed Central journal article supplement (PMC6702897; doi:10.3389/fneur.2019.00789), 2019-08-14
Supplement: Image_3.pdf [file Image_3.pdf]

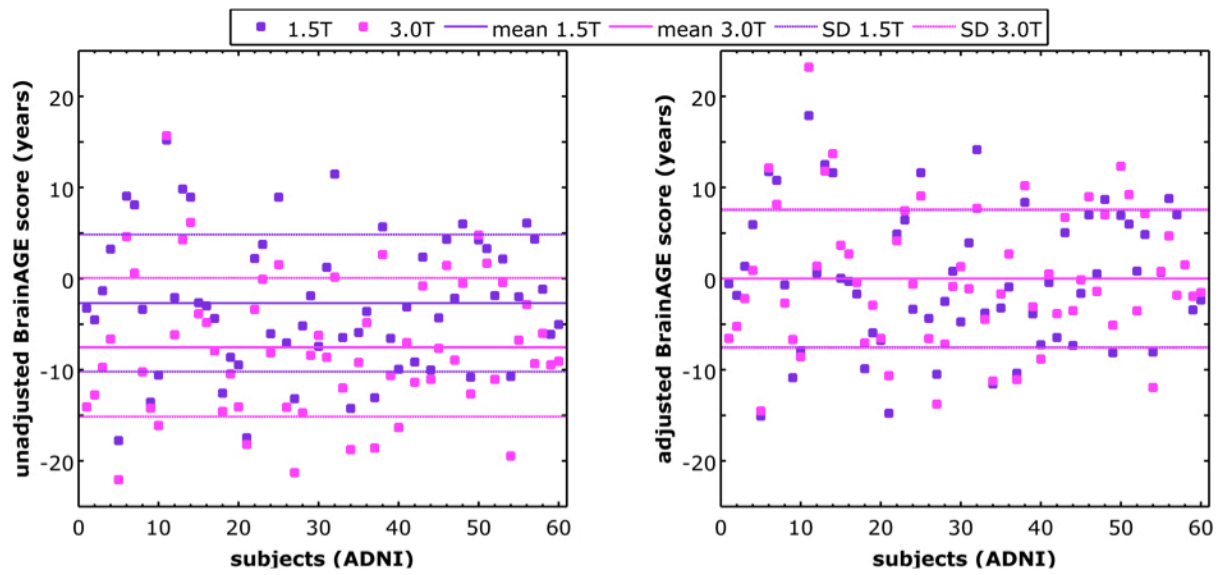

**Figure S3: Scanner-specific offset-correction.** Unadjusted (left panel) and scanner-specific offset-adjusted (right panel) *BrainAGE* scores for the same healthy subjects scanned on 1.5T and 3T MRI scanners within a short period of time. ICC between the *BrainAGE* scores calculated from the 1.5T and 3T scans was 0.90. [Figure and legend from Franke et al. (2012a), with permission from Hogrefe Publishing, Bern.]
