# Supplementary material for: Ten Years of BrainAGE as a Neuroimaging Biomarker of Brain Aging: What Insights Have We Gained?
Source: Front Neurol. 2019 Aug 14;10:789. doi: 10.3389/fneur.2019.00789 (PMC6702897; doi:10.3389/fneur.2019.00789)
Supplement: Supplementary file 2 [file Image_2.pdf]

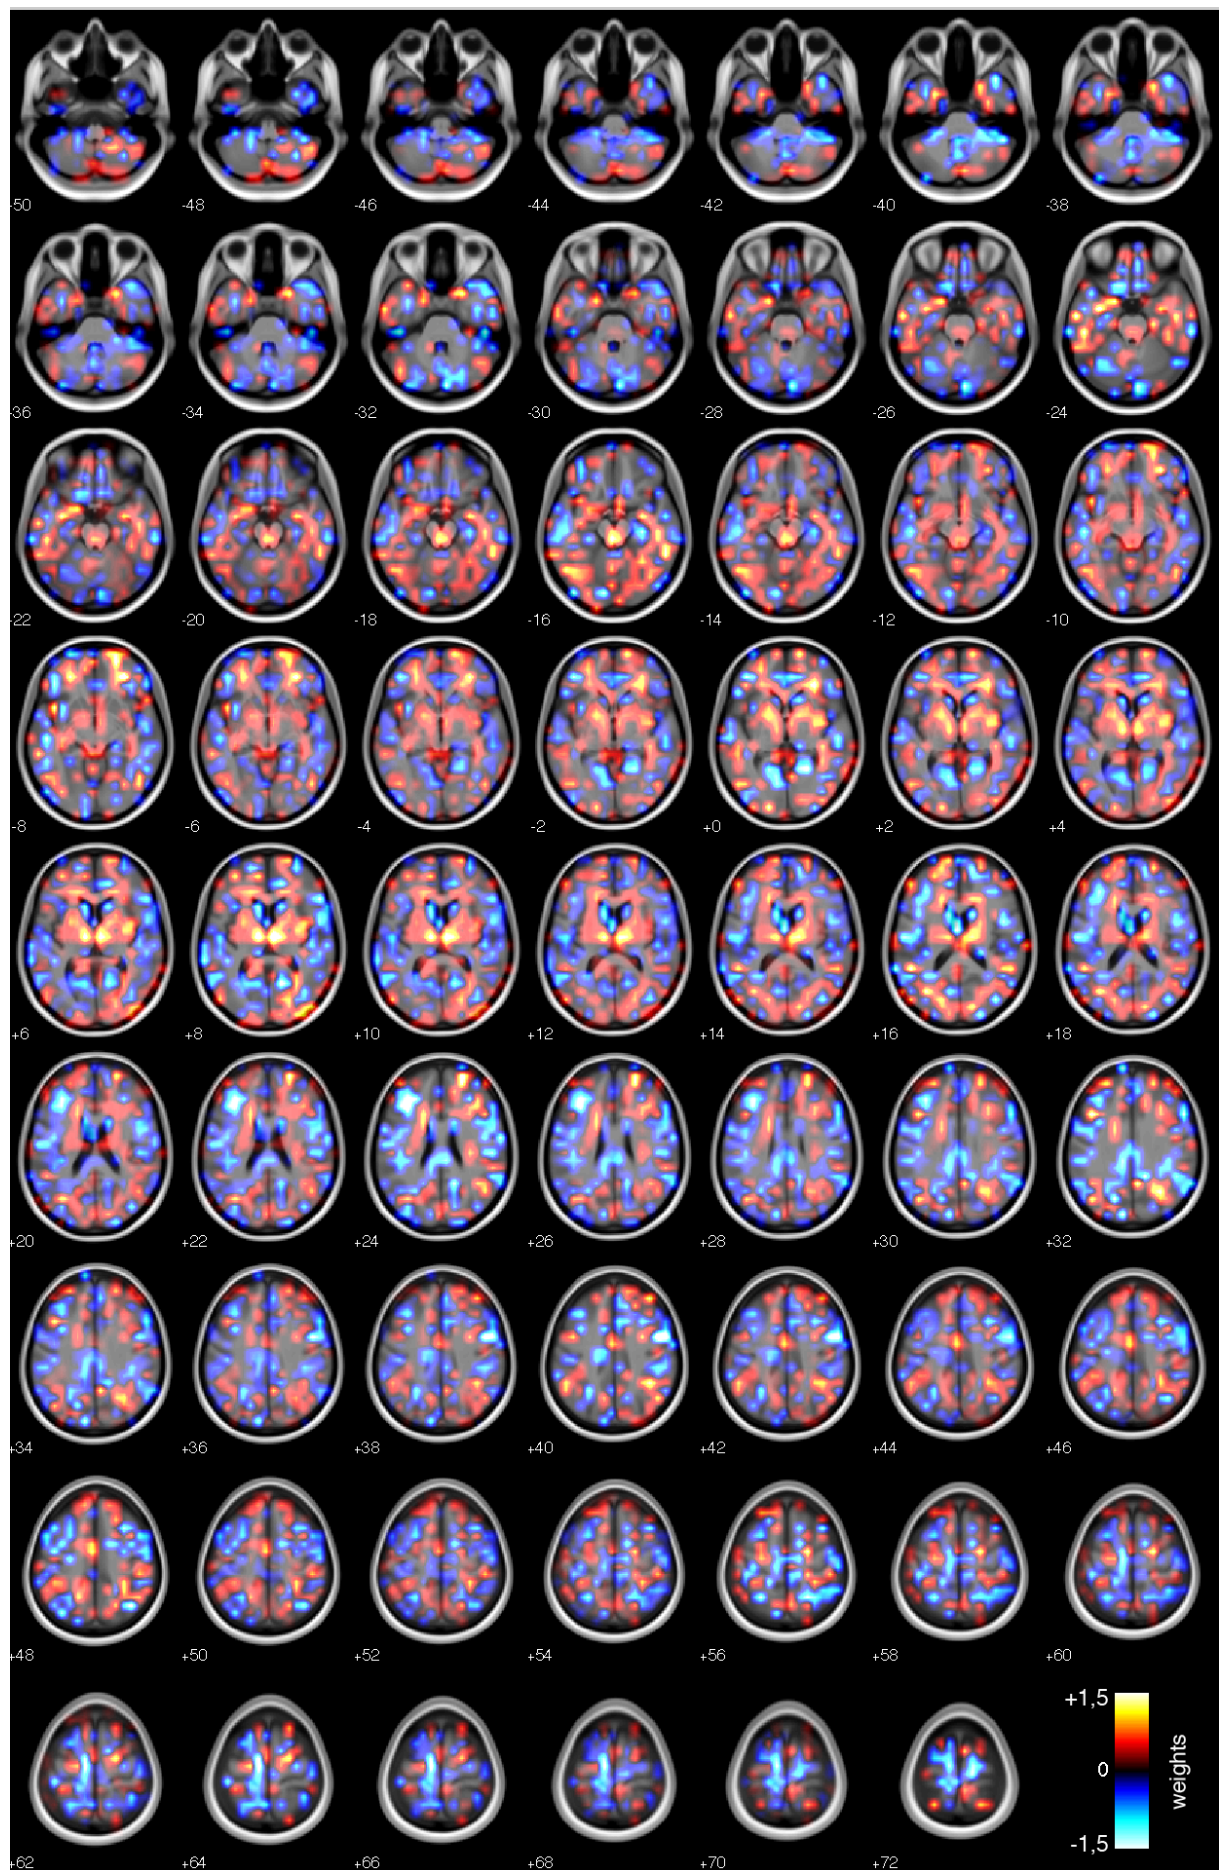

**Figure S2. Exemplary GM weight map for age regression during aging in RVR.** To exemplarily illustrate the most important GM features that were used by the RVR for estimating the age in adulthood based on structural MRI data, weights below the 5<sup>th</sup> and above the 95<sup>th</sup> quartile are displayed, overlaid on the normalized mean image of the sample. Color scale indicates the weight. [Figure and legend reproduced from (Franke et al., 2010), with permission from Elsevier, Amsterdam.]
